# Supplementary material for: Fabrication of La2NiO4nanoparticles as an efficient bifunctional cathode catalyst for rechargeable lithium–oxygen batteries
Source: Royal Society of Chemistry journal article supplement (doi:10.1039/c5ra23053e), 2016-01-01
Supplement: c5ra23053e1.pdf [file c5ra23053e1.pdf]

## Electronic Supplementary Information

# Fabrication of $\text{La}_2\text{NiO}_4$ Nanoparticles as an Efficient Bifunctional Cathode Catalyst for Rechargeable Lithium-Oxygen Batteries

*Zhongshan Wei,<sup>a</sup> Yanhui Cui,<sup>a</sup> Kevin Huang,<sup>b</sup> Jue Ouyang,<sup>a</sup> Junwei Wu,<sup>\*a</sup> Andrew P. Baker,<sup>a</sup> and Xinhe Zhang<sup>c</sup>*

a. Department of Materials Science and Engineering, Harbin Institute of Technology Shenzhen Graduate School, Shenzhen Key Laboratory of Advanced Materials, Shenzhen 518055, China. PR China. E-mail: junwei.wu@hitsz.edu.cn

b. Department of Mechanical Engineering, University of South Carolina, Columbia, SC 29201, USA.

c. Dongguan McNair Technology Co., Ltd, Dongguan City, Guangdong 523700, China

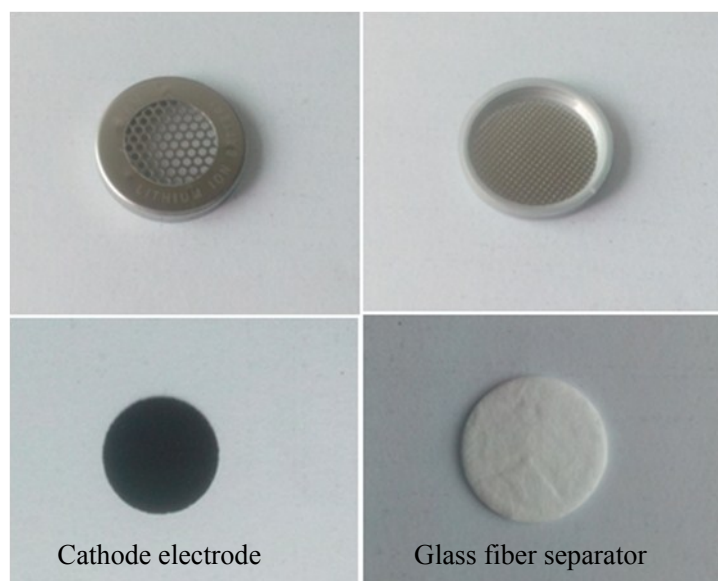

Fig. S1 The components images of 2032<sup>®</sup> coin-type cells

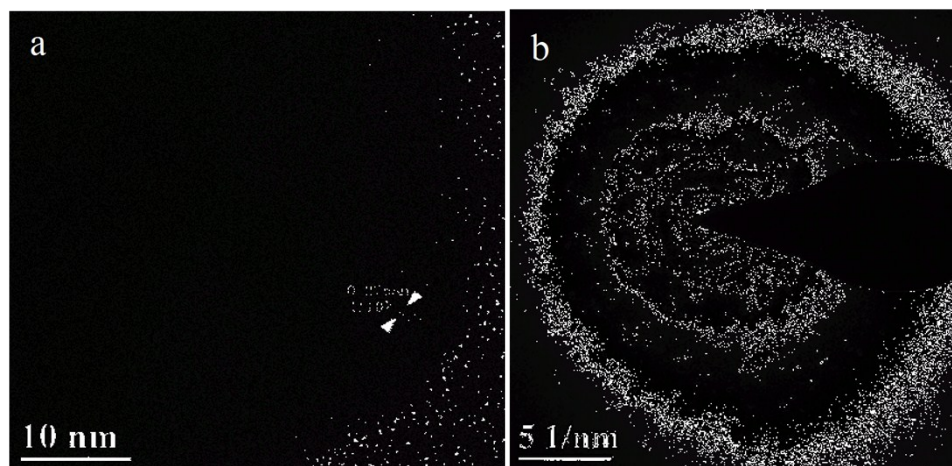

Fig. S2 HRTEM images of Pechini-LNO particles (a) and corresponding to select area electron diffraction (SAED) patterns (b)

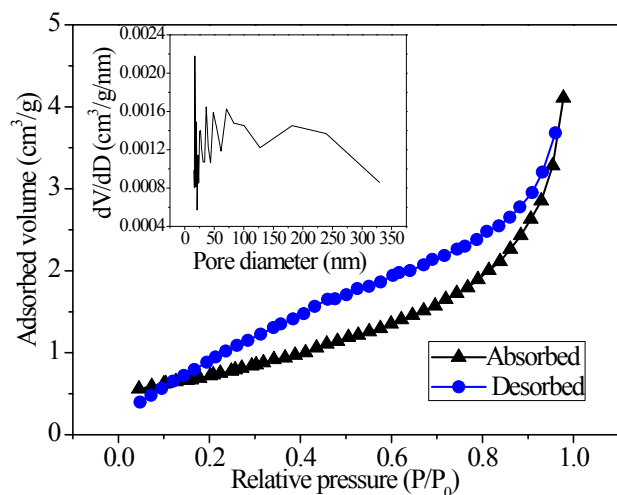

Fig. S3 Nitrogen adsorption-desorption isotherms and pore size distribution (inset) of Pechini-LNO particles

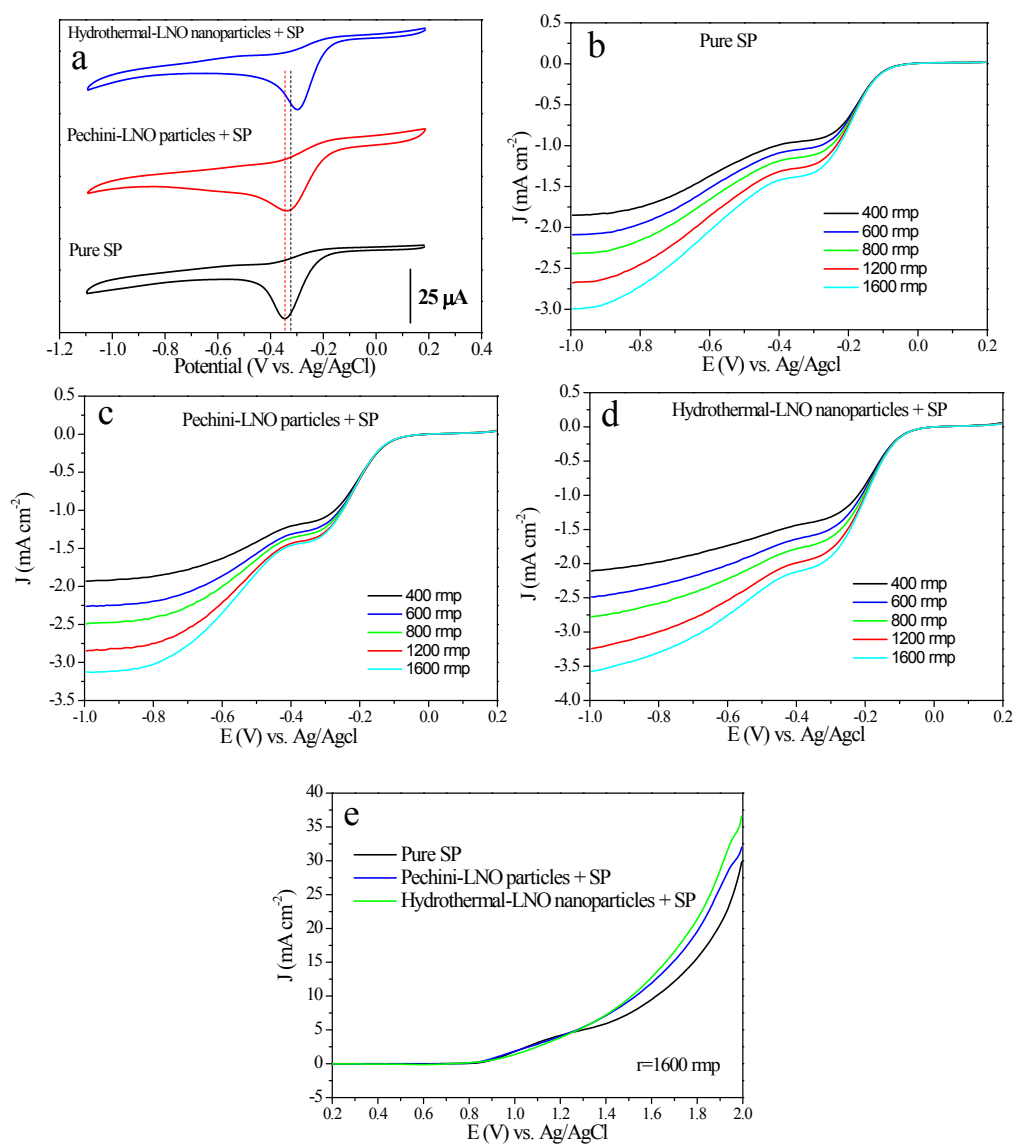

Fig.S4 CV curves of pure SP, Pechini-LNO particles + SP and hydrothermal-LNO nanoparticles + SP electrode (a). ORR polarization curves of pure SP, Pechini-LNO particles + SP and hydrothermal-LNO nanoparticles + SP electrode (b-d). OER polarization curves of pure SP, Pechini-LNO particles + SP, hydrothermal-LNO nanoparticles + SP on glassy carbon electrode at 1600-rmp rotation rates (e).

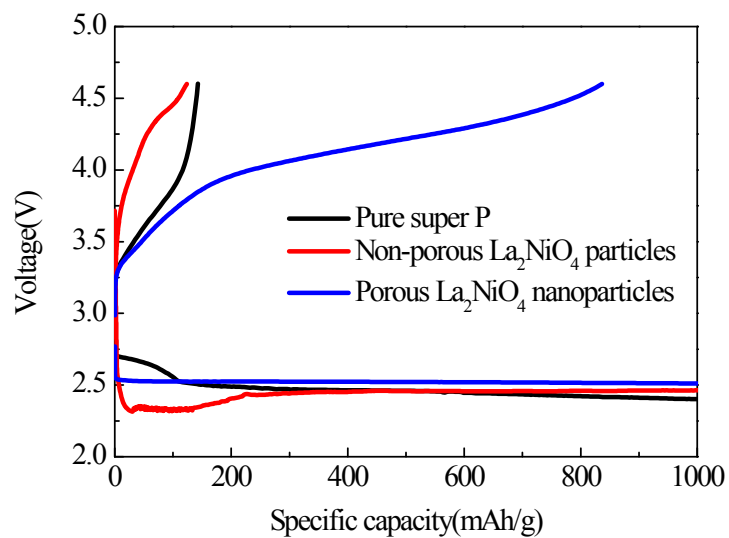

Fig. S5 The initial discharge-charge profile lithium-oxygen battery cells with pure SP, Pechini-LNO particles + SP and hydrothermal-LNO nanoparticles + SP electrodes at current density of  $0.16 \text{ mA cm}^{-2}$  (capacity were limited to  $1000 \text{ mAh g}^{-1}$ ).
